# Supplementary material for: Structural characterisation and optical properties of new alkaline earth phosphate CaMg(P4O12) and alkaline alumophosphate Cs3Al4(PO4)5
Source: Royal Society of Chemistry journal article supplement (doi:10.1039/d4dt01446d), 2024-01-01
Supplement: d4dt01446d1.pdf [file d4dt01446d1.pdf]

# Structural characterisation and optical properties of new alkaline earth phosphate $\text{CaMg}(\text{P}_4\text{O}_{12})$ and alkaline alumophosphate $\text{Cs}_3\text{Al}_4(\text{PO}_4)_5$

*Maierhaba Abudoureheman*<sup>a</sup>, *Jia Lv*<sup>a</sup>, *Menglin Zhu*<sup>b</sup>, *Hongheng Chen*<sup>b</sup>, *Bo Wei*<sup>a</sup>, *Lijun Jin*<sup>c</sup>, *Qun Jing*<sup>b,\*</sup>, *Zhaohui Chen*<sup>a,\*</sup>

<sup>a</sup> State Key Laboratory of Chemistry and Utilization of Carbon Based Energy Resources, Xinjiang Key Laboratory of Clean Conversion and Chemical Engineering Process, School of Chemical Engineering and Technology, Xinjiang University, 777 Huarui Road, Urumqi 830017, China

<sup>b</sup> Xinjiang Key Laboratory of Solid State Physics and Devices, School of Physical Science and Technology, Xinjiang University, 777 Huarui Road, Urumqi 830017, China

<sup>c</sup> School of Chemical Engineering, Dalian University of Technology, Dalian 116024, China

\* Corresponding authors, E-mails: [chenzhaohui686@sina.cn](mailto:chenzhaohui686@sina.cn), [qunjing@xju.edu.cn](mailto:qunjing@xju.edu.cn)

**Table S1.** The final coordinates ( $\times 10^4$ ) and equivalent isotropic displacement parameters ( $\text{\AA}^2 \times 10^3$ ) of non-hydrogen atoms for  $\text{CaMg}(\text{P}_4\text{O}_{12})$  and  $\text{Cs}_3\text{Al}_4(\text{PO}_4)_5$ .  $U_{eq}$  is defined as one-third of the trace of the orthogonalized  $U_{ij}$  tensor for each atom in the asymmetric unit.

| Atom | $x$      | $y$      | $z$      | $U_{eq}$ | Wyck. |
|------|----------|----------|----------|----------|-------|
| Ca1  | 0        | 4508(18) | 2500     | 17       | 4e    |
| Mg1  | 2500     | 2500     | 5000     | 12       | 4d    |
| P1   | 1912(12) | 29(16)   | 1966(16) | 12       | 8f    |
| P2   | 4950(13) | 2775(16) | 283(16)  | 12       | 8f    |
| O1   | 4604(4)  | 1383(4)  | 825(4)   | 19       | 8f    |
| O2   | 4175(4)  | 3831(4)  | 3279(4)  | 17       | 8f    |
| O3   | 570(4)   | 2424(4)  | 4282(4)  | 16       | 8f    |
| O4   | 1262(4)  | 1171(4)  | 546(4)   | 19       | 8f    |
| O5   | 2122(4)  | 4177(4)  | 3279(4)  | 14       | 8f    |
| O6   | 2309(4)  | 845(4)   | 3422(4)  | 17       | 8f    |

| Atom | $x$      | $y$      | $z$      | $U_{eq}$ | Wyck. |
|------|----------|----------|----------|----------|-------|
| Cs1  | 1361(5)  | 7200(7)  | 3292(3)  | 37       | 4e    |
| Cs2  | 2648(5)  | 137(6)   | 193(4)   | 39       | 4e    |
| Cs3  | 2838(5)  | 5068(6)  | 515(4)   | 37       | 4e    |
| P1   | 224(16)  | 2957(2)  | 507(12)  | 18       | 4e    |
| P2   | 1507(16) | 2015(2)  | 3346(12) | 20       | 4e    |
| P3   | 2437(16) | 8040(2)  | 1885(13) | 18       | 4e    |
| P4   | 5428(15) | 2810(18) | 495(12)  | 16       | 4e    |
| P5   | 4054(16) | 2938(18) | 2612(12) | 14       | 4e    |
| Al1  | 1796(18) | 1526(2)  | 1926(14) | 15       | 4e    |
| Al2  | 3943(18) | 1188(2)  | 3967(14) | 16       | 4e    |
| Al3  | 217(17)  | 6295(2)  | 1049(13) | 15       | 4e    |
| Al4  | 5641(17) | 1490(2)  | 1948(13) | 13       | 4e    |
| O1   | 945(5)   | 7771(7)  | 4667(4)  | 30       | 4e    |
| O2   | 690(5)   | 4507(5)  | 911(4)   | 25       | 4e    |
| O3   | 504(4)   | 2095(5)  | 4824(4)  | 21       | 4e    |
| O4   | 933(5)   | 1670(5)  | 1019(4)  | 24       | 4e    |
| O5   | 1625(5)  | 3603(7)  | 3626(4)  | 43       | 4e    |
| O6   | 2559(5)  | 1041(7)  | 3672(4)  | 28       | 4e    |
| O7   | 1131(4)  | 1914(7)  | 2498(4)  | 30       | 4e    |
| O8   | 655(4)   | 1053(7)  | 3512(4)  | 26       | 4e    |
| O9   | 2337(6)  | 5273(7)  | 7058(5)  | 53       | 4e    |
| O10  | 1293(5)  | 7374(7)  | 1625(4)  | 34       | 4e    |
| O11  | 7049(5)  | 2805(7)  | 3639(4)  | 45       | 4e    |
| O12  | 6916(5)  | 2270(5)  | 2367(4)  | 25       | 4e    |
| O13  | 5419(4)  | 4393(5)  | 850(4)   | 24       | 4e    |

---

|     |         |         |         |    |    |
|-----|---------|---------|---------|----|----|
| O14 | 6427(5) | 2555(7) | 376(4)  | 31 | 4e |
| O15 | 4391(5) | 2238(5) | 4781(4) | 28 | 4e |
| O16 | 5225(5) | 1595(5) | 1002(4) | 25 | 4e |
| O17 | 2860(5) | 2839(7) | 2120(4) | 29 | 4e |
| O18 | 4324(5) | 1986(7) | 3299(4) | 33 | 4e |
| O19 | 4672(5) | 2382(7) | 2175(4) | 32 | 4e |
| O20 | 4351(5) | 4592(5) | 2819(4) | 37 | 4e |

---

**Table S2.** Selected bond distances (Å) and bond angles (deg.) for CaMg(P<sub>4</sub>O<sub>12</sub>) and Cs<sub>3</sub>Al<sub>4</sub>(PO<sub>4</sub>)<sub>5</sub>.

|                      |          |                                        |            |
|----------------------|----------|----------------------------------------|------------|
| Cs1-O1               | 3.033(5) | O5 <sup>3</sup> -Cs2-O16 <sup>4</sup>  | 108.05(13) |
| Cs1-O5               | 3.170(6) | O11-Cs2-O1 <sup>3</sup>                | 65.88(14)  |
| Cs1-O6 <sup>2</sup>  | 3.637(5) | O11-Cs2-O3                             | 117.51(13) |
| Cs1-O7 <sup>1</sup>  | 3.101(4) | O11-Cs2-O4                             | 79.00(13)  |
| Cs1-O8 <sup>2</sup>  | 3.538(5) | O11-Cs2-O5 <sup>3</sup>                | 154.19(16) |
| Cs1-O8 <sup>1</sup>  | 3.671(5) | O11-Cs2-O14 <sup>5</sup>               | 79.67(15)  |
| Cs1-O10 <sup>1</sup> | 3.274(5) | O11-Cs2-O15 <sup>4</sup>               | 134.95(13) |
| Cs1-O12 <sup>1</sup> | 3.079(5) | O11-Cs2-O16 <sup>4</sup>               | 94.76(13)  |
| Cs1-O14 <sup>1</sup> | 3.116(5) | O14 <sup>5</sup> -Cs2-O1 <sup>3</sup>  | 68.55(13)  |
| Cs2-O1 <sup>3</sup>  | 3.282(5) | O14 <sup>5</sup> -Cs2-O3               | 147.42(12) |
| Cs2-O3               | 3.594(4) | O14 <sup>5</sup> -Cs2-O4               | 151.97(12) |
| Cs2-O4               | 3.570(5) | O14 <sup>5</sup> -Cs2-O5 <sup>3</sup>  | 88.92(14)  |
| Cs2-O5 <sup>3</sup>  | 3.058(6) | O14 <sup>5</sup> -Cs2-O15 <sup>4</sup> | 89.96(12)  |
| Cs2-O11              | 2.974(6) | O14 <sup>5</sup> -Cs2-O16 <sup>4</sup> | 88.21(12)  |
| Cs2-O14 <sup>4</sup> | 3.058(5) | O15 <sup>4</sup> -Cs2-O3               | 94.42(11)  |
| Cs2-O15 <sup>5</sup> | 3.582(5) | O16 <sup>4</sup> -Cs2-O3               | 115.59(11) |
| Cs2-O16 <sup>5</sup> | 3.432(5) | O16 <sup>4</sup> -Cs2-O4               | 111.48(11) |
| Cs3-O1 <sup>3</sup>  | 3.069(5) | O16 <sup>4</sup> -Cs2-O15 <sup>4</sup> | 40.77(11)  |
| Cs3-O2 <sup>6</sup>  | 3.316(5) | O1 <sup>3</sup> -Cs3-O2 <sup>6</sup>   | 66.84(12)  |
| Cs3-O3 <sup>6</sup>  | 3.440(4) | O1 <sup>3</sup> -Cs3-O3 <sup>6</sup>   | 71.54(12)  |
| Cs3-O6 <sup>8</sup>  | 3.652(5) | O1 <sup>3</sup> -Cs3-O6 <sup>8</sup>   | 82.90(12)  |
| Cs3-O11              | 2.868(6) | O1 <sup>3</sup> -Cs3-O13 <sup>7</sup>  | 142.41(12) |
| Cs3-O13 <sup>7</sup> | 3.319(4) | O1 <sup>3</sup> -Cs3-O14 <sup>5</sup>  | 70.61(13)  |
| Cs3-O14 <sup>4</sup> | 3.116(5) | O1 <sup>3</sup> -Cs3-O15 <sup>7</sup>  | 127.31(12) |
| Cs3-O15 <sup>7</sup> | 3.587(5) | O1 <sup>3</sup> -Cs3-O17               | 120.65(12) |
| Cs3-O17              | 3.710(5) | O2 <sup>6</sup> -Cs3-O3 <sup>6</sup>   | 43.18(10)  |
| P1-O1                | 1.481(5) | O2 <sup>6</sup> -Cs3-O6 <sup>8</sup>   | 116.34(11) |
| P1-O2                | 1.559(5) | O2 <sup>6</sup> -Cs3-O13 <sup>7</sup>  | 150.22(11) |
| P1-O3                | 1.544(4) | O2 <sup>6</sup> -Cs3-O15 <sup>7</sup>  | 135.78(11) |
| P1-O4                | 1.552(5) | O2 <sup>6</sup> -Cs3-O17               | 55.48(10)  |
| P2-O5                | 1.466(6) | O3 <sup>6</sup> -Cs3-O6 <sup>8</sup>   | 75.04(10)  |
| P2-O6                | 1.552(5) | O3 <sup>6</sup> -Cs3-O15 <sup>7</sup>  | 97.05(10)  |
| P2-O7                | 1.556(5) | O3 <sup>6</sup> -Cs3-O17               | 75.86(10)  |
| P2-O8                | 1.553(5) | O6 <sup>8</sup> -Cs3-O17               | 133.22(11) |
| P3-O9                | 1.516(5) | O11-Cs3-O1 <sup>3</sup>                | 70.05(15)  |
| P3-O10               | 1.529(5) | O11-Cs3-O2 <sup>6</sup>                | 80.36(13)  |

---

|                         |            |                                        |            |
|-------------------------|------------|----------------------------------------|------------|
| P3-O11                  | 1.473(5)   | O11-Cs3-O3 <sup>6</sup>                | 120.68(13) |
| P3-O12                  | 1.542(5)   | O11-Cs3-O6 <sup>8</sup>                | 139.64(14) |
| P4-O13                  | 1.541(5)   | O11-Cs3-O13 <sup>7</sup>               | 102.64(13) |
| P4-O14                  | 1.470(5)   | O11-Cs3-O14 <sup>5</sup>               | 80.33(14)  |
| P4-O15                  | 1.546(5)   | O11-Cs3-O15 <sup>7</sup>               | 142.26(13) |
| P4-O16                  | 1.551(5)   | O11-Cs3-O17                            | 86.96(13)  |
| P5-O17                  | 1.518(5)   | O13 <sup>7</sup> -Cs3-O3 <sup>6</sup>  | 134.60(11) |
| P5-O18                  | 1.507(5)   | O13 <sup>7</sup> -Cs3-O6 <sup>8</sup>  | 80.75(10)  |
| P5-O19                  | 1.498(5)   | O13 <sup>7</sup> -Cs3-O15 <sup>7</sup> | 41.58(10)  |
| P5-O20                  | 1.497(5)   | O13 <sup>7</sup> -Cs3-O17              | 94.85(11)  |
| A11-O4                  | 1.719(5)   | O14 <sup>5</sup> -Cs3-O2 <sup>6</sup>  | 137.08(12) |
| A11-O7 <sup>1</sup>     | 1.732(5)   | O14 <sup>5</sup> -Cs3-O3 <sup>6</sup>  | 125.22(12) |
| A11-O9                  | 1.693(5)   | O14 <sup>5</sup> -Cs3-O6 <sup>8</sup>  | 62.31(12)  |
| A11-O17 <sup>2</sup>    | 1.746(5)   | O14 <sup>5</sup> -Cs3-O13 <sup>7</sup> | 71.81(12)  |
| A12-O6                  | 1.721(5)   | O14 <sup>5</sup> -Cs3-O15 <sup>7</sup> | 76.69(12)  |
| A12-O13 <sup>9</sup>    | 1.740(5)   | O14 <sup>5</sup> -Cs3-O17              | 158.84(12) |
| A12-O15 <sup>10</sup>   | 1.738(5)   | O15 <sup>7</sup> -Cs3-O6 <sup>8</sup>  | 45.07(10)  |
| A12-O18 <sup>1</sup>    | 1.742(5)   | O15 <sup>7</sup> -Cs3-O17              | 104.54(11) |
| A13-O2 <sup>6</sup>     | 1.734(5)   | O1-P1-O2                               | 112.9(3)   |
| A13-O3 <sup>3</sup>     | 1.758(5)   | O1-P1-O3                               | 113.4(3)   |
| A13-O8                  | 1.727(5)   | O1-P1-O4                               | 113.4(3)   |
| A13-O10                 | 1.721(5)   | O3-P1-O2                               | 106.7(3)   |
| A14-O12                 | 1.720(5)   | O3-P1-O4                               | 104.6(3)   |
| A14-O16                 | 1.736(5)   | O4-P1-O2                               | 105.3(2)   |
| A14-O19 <sup>5</sup>    | 1.720(5)   | O5-P2-O6                               | 114.0(3)   |
| A14-O20                 | 1.704(5)   | O5-P2-O7                               | 113.7(3)   |
| O1-Cs1-O5               | 90.97(14)  | O5-P2-O8                               | 113.6(3)   |
| O1-Cs1-O6 <sup>2</sup>  | 83.65(12)  | O6-P2-O7                               | 105.8(3)   |
| O1-Cs1-O7 <sup>1</sup>  | 85.42(12)  | O6-P2-O8                               | 104.5(3)   |
| O1-Cs1-O8 <sup>1</sup>  | 126.33(11) | O8-P2-O7                               | 104.3(3)   |
| O1-Cs1-O8 <sup>2</sup>  | 65.29(12)  | O9-P3-O10                              | 105.7(3)   |
| O1-Cs1-O10 <sup>1</sup> | 163.50(13) | O9-P3-O12                              | 105.3(3)   |
| O1-Cs1-O12 <sup>1</sup> | 144.69(13) | O10-P3-O12                             | 105.8(3)   |
| O1-Cs1-O14 <sup>1</sup> | 71.08(13)  | O11-P3-O9                              | 113.6(4)   |
| O5-Cs1-O6 <sup>2</sup>  | 148.03(12) | O11-P3-O10                             | 113.6(3)   |
| O5-Cs1-O8 <sup>2</sup>  | 155.66(13) | O11-P3-O12                             | 112.0(3)   |
| O5-Cs1-O8 <sup>1</sup>  | 85.26(13)  | O13-P4-O15                             | 105.9(3)   |
| O5-Cs1-O10 <sup>1</sup> | 102.25(14) | O13-P4-O16                             | 105.7(3)   |

---

|                                        |            |                                         |          |
|----------------------------------------|------------|-----------------------------------------|----------|
| O6 <sup>2</sup> -Cs1-O8 <sup>1</sup>   | 123.01(11) | O14-P4-O13                              | 112.3(3) |
| O7 <sup>1</sup> -Cs1-O5                | 92.12(14)  | O14-P4-O15                              | 113.5(3) |
| O7 <sup>1</sup> -Cs1-O6 <sup>2</sup>   | 118.66(12) | O14-P4-O16                              | 114.2(3) |
| O7 <sup>1</sup> -Cs1-O8 <sup>2</sup>   | 81.23(12)  | O15-P4-O16                              | 104.4(3) |
| O7 <sup>1</sup> -Cs1-O8 <sup>1</sup>   | 41.46(11)  | O18-P5-O17                              | 111.4(3) |
| O7 <sup>1</sup> -Cs1-O10 <sup>1</sup>  | 84.27(12)  | O19-P5-O17                              | 107.3(3) |
| O7 <sup>1</sup> -Cs1-O14 <sup>1</sup>  | 156.37(12) | O19-P5-O18                              | 111.0(3) |
| O8 <sup>2</sup> -Cs1-O6 <sup>2</sup>   | 39.98(10)  | O20-P5-O17                              | 109.2(3) |
| O8 <sup>2</sup> -Cs1-O8 <sup>1</sup>   | 104.08(9)  | O20-P5-O18                              | 109.4(3) |
| O10 <sup>1</sup> -Cs1-O6 <sup>2</sup>  | 90.04(11)  | O20-P5-O19                              | 108.4(3) |
| O10 <sup>1</sup> -Cs1-O8 <sup>1</sup>  | 46.61(11)  | O4-Al1-O7 <sup>1</sup>                  | 111.2(2) |
| O10 <sup>1</sup> -Cs1-O8 <sup>2</sup>  | 100.35(12) | O4-Al1-O17 <sup>2</sup>                 | 109.8(2) |
| O12 <sup>1</sup> -Cs1-O5               | 93.85(13)  | O7 <sup>1</sup> -Al1-O17 <sup>2</sup>   | 108.7(3) |
| O12 <sup>1</sup> -Cs1-O6 <sup>2</sup>  | 73.96(12)  | O9-Al1-O4                               | 107.4(3) |
| O12 <sup>1</sup> -Cs1-O7 <sup>1</sup>  | 129.23(12) | O9-Al1-O7 <sup>1</sup>                  | 112.3(3) |
| O12 <sup>1</sup> -Cs1-O8 <sup>2</sup>  | 108.54(11) | O9-Al1-O17 <sup>2</sup>                 | 107.4(3) |
| O12 <sup>1</sup> -Cs1-O8 <sup>1</sup>  | 88.95(11)  | O6-Al2-O13 <sup>9</sup>                 | 112.5(2) |
| O12 <sup>1</sup> -Cs1-O10 <sup>1</sup> | 45.23(12)  | O6-Al2-O15 <sup>12</sup>                | 106.6(2) |
| O12 <sup>1</sup> -Cs1-O14 <sup>1</sup> | 74.40(12)  | O6-Al2-O18 <sup>1</sup>                 | 112.0(2) |
| O14 <sup>1</sup> -Cs1-O5               | 85.92(14)  | O13 <sup>9</sup> -Al2-O18 <sup>1</sup>  | 104.0(3) |
| O14 <sup>1</sup> -Cs1-O6 <sup>2</sup>  | 62.50(11)  | O15 <sup>12</sup> -Al2-O13 <sup>9</sup> | 108.1(2) |
| O14 <sup>1</sup> -Cs1-O8 <sup>1</sup>  | 160.56(11) | O15 <sup>12</sup> -Al2-O18 <sup>1</sup> | 113.7(3) |
| O14 <sup>1</sup> -Cs1-O8 <sup>2</sup>  | 90.92(12)  | O2 <sup>6</sup> -Al3-O3 <sup>3</sup>    | 106.8(2) |
| O14 <sup>1</sup> -Cs1-O10 <sup>1</sup> | 119.18(12) | O8-Al3-O2 <sup>6</sup>                  | 109.7(2) |
| O1 <sup>3</sup> -Cs2-O3                | 92.41(11)  | O8-Al3-O3 <sup>3</sup>                  | 108.9(2) |
| O1 <sup>3</sup> -Cs2-O4                | 86.17(11)  | O10-Al3-O2 <sup>6</sup>                 | 108.8(3) |
| O1 <sup>3</sup> -Cs2-O15 <sup>4</sup>  | 148.28(12) | O10-Al3-O3 <sup>3</sup>                 | 115.6(3) |
| O1 <sup>3</sup> -Cs2-O16 <sup>4</sup>  | 151.52(12) | O10-Al3-O8                              | 107.0(3) |
| O4-Cs2-O3                              | 39.99(10)  | O12-Al4-O16                             | 109.6(2) |
| O4-Cs2-O15 <sup>4</sup>                | 118.02(11) | O12-Al4-O19 <sup>4</sup>                | 114.4(3) |
| O5 <sup>3</sup> -Cs2-O1 <sup>3</sup>   | 88.42(14)  | O19 <sup>4</sup> -Al4-O16               | 107.7(3) |
| O5 <sup>3</sup> -Cs2-O3                | 63.48(12)  | O20-Al4-O12                             | 110.4(3) |
| O5 <sup>3</sup> -Cs2-O4                | 102.75(12) | O20-Al4-O16                             | 107.9(3) |
| O5 <sup>3</sup> -Cs2-O15 <sup>4</sup>  | 67.36(13)  | O20-Al4-O19 <sup>4</sup>                | 106.6(3) |

<sup>1</sup>3/2-X, 1/2+Y, 1/2-Z; <sup>2</sup>+X, 1+Y, +Z; <sup>3</sup>1-X, 1-Y, -Z; <sup>4</sup>-1/2+X, 1/2-Y, -1/2+Z; <sup>5</sup>1/2-X, 1/2+Y, 1/2-Z; <sup>6</sup>+X, -1+Y, +Z; <sup>7</sup>1/2-X, -1/2+Y, 1/2-Z; <sup>8</sup>1-X, -Y, -Z; <sup>9</sup>3/2-X, -1/2+Y, 1/2-Z; <sup>10</sup>1/2+X, 1/2-Y, -1/2+Z; <sup>11</sup>1+X, +Y, +Z; <sup>12</sup>1/2+X, 1/2-Y, -1/2+Z; <sup>13</sup>-1/2+X, 1/2-Y, 1/2+Z.

|                                      |            |                                        |            |
|--------------------------------------|------------|----------------------------------------|------------|
| Ca1-O5 <sup>2</sup>                  | 2.317(3)   | O5 <sup>2</sup> -Ca1-O5 <sup>1</sup>   | 165.81(18) |
| Ca1-O5 <sup>1</sup>                  | 2.317(3)   | O5 <sup>1</sup> -Ca1-O3 <sup>4</sup>   | 76.85(12)  |
| Ca1-O3 <sup>4</sup>                  | 2.380(4)   | O5 <sup>2</sup> -Ca1-O3 <sup>4</sup>   | 92.32(12)  |
| Ca1-O3 <sup>3</sup>                  | 2.380(4)   | O5 <sup>2</sup> -Ca1-O3 <sup>3</sup>   | 76.85(12)  |
| Ca1-O1                               | 2.198(4)   | O5 <sup>1</sup> -Ca1-O3 <sup>3</sup>   | 92.32(12)  |
| Ca1-O1 <sup>7</sup>                  | 2.198(4)   | O1 <sup>7</sup> -Ca1-O1                | 85.14(19)  |
| P1-O5                                | 1.490(4)   | O5-P1-O2 <sup>8</sup>                  | 107.7(2)   |
| P1-O6                                | 1.462(4)   | O5-P1-O4                               | 105.26(19) |
| P1-O2 <sup>8</sup>                   | 1.598(4)   | O6-P1-O5                               | 118.6(2)   |
| P1-O4                                | 1.585(4)   | O6-P1-O2 <sup>8</sup>                  | 109.0(2)   |
| P2-O3                                | 1.503(3)   | O6-P1-O4                               | 111.4(2)   |
| P2-O1                                | 1.455(4)   | O4-P1-O2 <sup>8</sup>                  | 103.9(2)   |
| P2-O2                                | 1.595(4)   | O3-P2-Ca1                              | 116.36(15) |
| P2-O4                                | 1.584(4)   | O3-P2-O2                               | 108.9(2)   |
| Mg1-O5 <sup>5</sup>                  | 2.112(3)   | O3-P2-O4                               | 110.57(19) |
| Mg1-O5 <sup>10</sup>                 | 2.112(3)   | O1-P2-O3                               | 117.7(2)   |
| Mg1-O6                               | 2.045(3)   | O1-P2-O2                               | 109.3(2)   |
| Mg1-O6 <sup>11</sup>                 | 2.045(3)   | O1-P2-O4                               | 108.1(2)   |
| Mg1-O3 <sup>12</sup>                 | 2.090(3)   | O4-P2-O2                               | 101.1(2)   |
| Mg1-O3 <sup>13</sup>                 | 2.090(3)   | O5 <sup>6</sup> -Mg1-O5 <sup>10</sup>  | 180.0      |
| Ca1 <sup>2</sup> -O5                 | 2.317(3)   | O6-Mg1-O5 <sup>10</sup>                | 92.07(13)  |
| Mg1 <sup>14</sup> -O5                | 2.112(3)   | O6 <sup>11</sup> -Mg1-O5 <sup>10</sup> | 87.93(13)  |
| Ca1 <sup>3</sup> -O3                 | 2.380(4)   | O6-Mg1-O5 <sup>6</sup>                 | 87.93(13)  |
| Mg1 <sup>12</sup> -O3                | 2.090(3)   | O6 <sup>11</sup> -Mg1-O5 <sup>6</sup>  | 92.07(13)  |
| P1 <sup>8</sup> -O2                  | 1.598(4)   | O6 <sup>11</sup> -Mg1-O6               | 180.0      |
| O3 <sup>3</sup> -Ca1-O3 <sup>4</sup> | 81.66(17)  | O6 <sup>11</sup> -Mg1-O3 <sup>12</sup> | 89.26(13)  |
| O1-Ca1-O5 <sup>1</sup>               | 91.59(13)  | O6 <sup>11</sup> -Mg1-O3 <sup>13</sup> | 90.74(13)  |
| O1 <sup>7</sup> -Ca1-O5 <sup>2</sup> | 91.59(13)  | O6-Mg1-O3 <sup>12</sup>                | 90.74(13)  |
| O1-Ca1-O5 <sup>2</sup>               | 98.87(13)  | O6-Mg1-O3 <sup>13</sup>                | 89.26(13)  |
| O1 <sup>7</sup> -Ca1-O5 <sup>1</sup> | 98.87(13)  | O3 <sup>12</sup> -Mg1-O5 <sup>6</sup>  | 88.03(13)  |
| O1-Ca1-O3 <sup>3</sup>               | 175.33(12) | O3 <sup>12</sup> -Mg1-O5 <sup>10</sup> | 91.97(13)  |
| O1-Ca1-O3 <sup>4</sup>               | 96.76(12)  | O3 <sup>13</sup> -Mg1-O5 <sup>10</sup> | 88.03(13)  |
| O1 <sup>7</sup> -Ca1-O3 <sup>4</sup> | 175.33(12) | O3 <sup>13</sup> -Mg1-O5 <sup>6</sup>  | 91.97(13)  |
| O1 <sup>7</sup> -Ca1-O3 <sup>3</sup> | 96.77(12)  | O3 <sup>13</sup> -Mg1-O3 <sup>12</sup> | 180.00(6)  |

<sup>1</sup>-1/2+X, 1/2-Y, -1/2+Z; <sup>2</sup>3/2-X, 1/2-Y, 1-Z; <sup>3</sup>1-X, -Y, 1-Z; <sup>4</sup>+X, -Y, -1/2+Z; <sup>5</sup>3/2-X, -1/2+Y, 3/2-Z; <sup>6</sup>-1/2+X, -1/2+Y, -1+Z; <sup>7</sup>1-X, +Y, 1/2-Z; <sup>8</sup>1-X, 1-Y, 1-Z; <sup>9</sup>1/2+X, 1/2+Y, 1+Z; <sup>10</sup>+X, 1-Y, 1/2+Z; <sup>11</sup>3/2-X, 1/2-Y, 2-Z; <sup>12</sup>1-X, +Y, 3/2-Z; <sup>13</sup>1/2+X, 1/2-Y, 1/2+Z; <sup>14</sup>3/2-X, 1/2+Y, 3/2-Z.

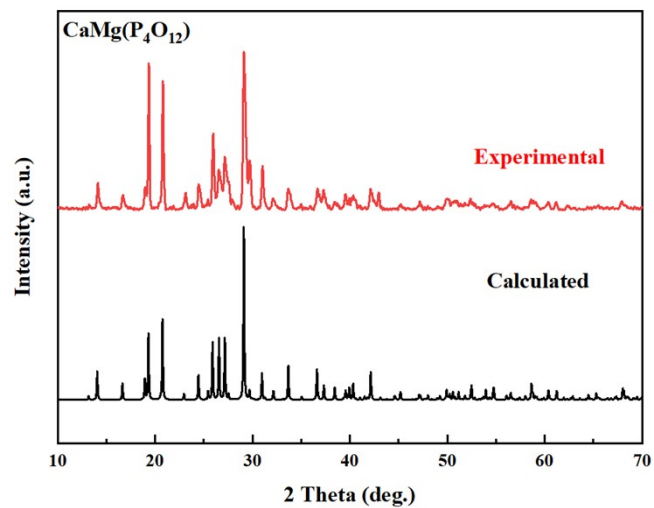

**Figure S1.** Experimental and calculated X-ray powder diffraction patterns of  $\text{CaMg}(\text{P}_4\text{O}_{12})$ .
